# Supplementary material
Source: PubMed Central journal article supplement (PMC5810403)

# Supplementary Material for “Considerations for Analysis of Time-to-Event Outcomes Measured with Error: Bias and Correction with SIMEX”

Eric J. Oh<sup>1</sup>, Bryan Shepherd<sup>2</sup>, Thomas Lumley<sup>3</sup>, and Pamela A. Shaw<sup>1,\*</sup>

<sup>1</sup>Department of Biostatistics, Epidemiology, and Informatics, University of Pennsylvania Perelman School of Medicine, Philadelphia, U.S.A. <sup>2</sup>Department of Biostatistics, Vanderbilt University School of Medicine, Nashville, Tennessee, U.S.A. <sup>3</sup>Department of Statistics, University of Auckland, Auckland, New Zealand

\*Corresponding author: Pamela Shaw; e-mail [shawp@upenn.edu](mailto:shawp@upenn.edu)

Table 1: The quantiles, mean, and standard deviation (SD) for the error-prone event time divided by true event time ( $\frac{T'}{T}$ ) for  $\beta = \log(1.5)$  and  $n = 1000$ .

| Error Distribution | $\sigma_\nu^2$ | 5 <sup>th</sup> | 25 <sup>th</sup> | 50 <sup>th</sup> | Mean  | 75 <sup>th</sup> | 95 <sup>th</sup> | SD    |
|--------------------|----------------|-----------------|------------------|------------------|-------|------------------|------------------|-------|
| Normal             | 0.25           | 0.460           | 0.715            | 1.013            | 1.146 | 1.410            | 2.407            | 0.608 |
|                    | 0.5            | 0.337           | 0.575            | 0.973            | 1.254 | 1.586            | 3.009            | 0.964 |
|                    | 1              | 0.190           | 0.531            | 1.100            | 1.687 | 2.078            | 5.021            | 1.949 |
|                    | 2              | 0.091           | 0.375            | 0.948            | 2.550 | 2.521            | 10.15            | 5.139 |
| Shifted Gamma      | 0.25           | 0.518           | 0.700            | 0.927            | 1.208 | 1.367            | 2.753            | 0.938 |
|                    | 0.5            | 0.437           | 0.588            | 0.863            | 1.484 | 1.444            | 4.143            | 2.810 |
|                    | 1              | 0.392           | 0.493            | 0.772            | 2.970 | 1.609            | 8.798            | 14.76 |
|                    | 2              | 0.370           | 0.405            | 0.564            | 35.99 | 1.329            | 23.49            | 657.0 |

Table 2: The percent (%) bias (absolute bias for intercept  $\alpha_0$ ), average model standard error (ASE), empirical standard error (ESE), mean squared error (MSE), and coverage probabilities (CP) are given for 2000 simulated data sets with  $n = 1000$ , exponential time, and shifted gamma error.

| $\beta$  | $\sigma_\nu^2$ | Weibull Model |            |        | Cox Model |         |        |
|----------|----------------|---------------|------------|--------|-----------|---------|--------|
|          |                | $\alpha_0$    | $\alpha_1$ | shape  | $\beta$   | $\beta$ |        |
| log(1.5) | 0.25           | Bias          | 0.059      | 0.120  | -12.51    | -14.23  | -18.39 |
|          |                | ASE           | 0.039      | 0.041  | 0.021     | 0.036   | 0.033  |
|          |                | ESE           | 0.040      | 0.042  | 0.000     | 0.038   | 0.034  |
|          |                | MSE           | 0.071      | 0.042  | 0.125     | 0.069   | 0.082  |
|          |                | CP            | 0.664      | 0.973  | 0.000     | 0.640   | 0.390  |
|          | 0.5            | Bias          | 0.119      | 0.020  | -25.17    | -26.58  | -29.89 |
|          |                | ASE           | 0.046      | 0.055  | 0.020     | 0.041   | 0.033  |
|          |                | ESE           | 0.046      | 0.061  | 0.000     | 0.046   | 0.035  |
|          |                | MSE           | 0.127      | 0.061  | 0.252     | 0.117   | 0.126  |
|          |                | CP            | 0.252      | 0.964  | 0.000     | 0.262   | 0.058  |
|          | 1              | Bias          | 0.233      | -0.220 | -47.33    | -43.70  | -41.78 |
|          |                | ASE           | 0.061      | 0.087  | 0.016     | 0.049   | 0.032  |
|          |                | ESE           | 0.061      | 0.105  | 0.000     | 0.060   | 0.035  |
|          |                | MSE           | 0.240      | 0.105  | 0.473     | 0.187   | 0.173  |
|          |                | CP            | 0.020      | 0.959  | 0.000     | 0.074   | 0.001  |
|          | 2              | Bias          | 0.441      | 1.110  | -61.09    | -60.65  | -50.90 |
|          |                | ASE           | 0.171      | 0.210  | 0.028     | 0.089   | 0.032  |
|          |                | ESE           | 0.095      | 0.203  | 0.000     | 0.077   | 0.035  |
|          |                | MSE           | 0.451      | 0.203  | 0.611     | 0.258   | 0.209  |
|          |                | CP            | 0.005      | 0.939  | 0.004     | 0.056   | 0.000  |
| log(3)   | 0.25           | Bias          | 0.059      | 0.040  | -15.62    | -14.34  | -16.53 |
|          |                | ASE           | 0.039      | 0.042  | 0.021     | 0.042   | 0.040  |
|          |                | ESE           | 0.039      | 0.041  | 0.000     | 0.046   | 0.046  |
|          |                | MSE           | 0.073      | 0.041  | 0.156     | 0.164   | 0.187  |
|          |                | CP            | 0.636      | 0.978  | 0.000     | 0.052   | 0.021  |
|          | 0.5            | Bias          | 0.118      | -0.030 | -24.78    | -26.43  | -28.70 |
|          |                | ASE           | 0.046      | 0.055  | 0.020     | 0.046   | 0.038  |
|          |                | ESE           | 0.045      | 0.059  | 0.000     | 0.056   | 0.049  |
|          |                | MSE           | 0.126      | 0.059  | 0.248     | 0.296   | 0.319  |
|          |                | CP            | 0.264      | 0.974  | 0.000     | 0.000   | 0.000  |
|          | 1              | Bias          | 0.230      | -0.050 | -45.67    | -43.38  | -42.55 |
|          |                | ASE           | 0.061      | 0.088  | 0.017     | 0.052   | 0.035  |
|          |                | ESE           | 0.060      | 0.105  | 0.000     | 0.074   | 0.049  |
|          |                | MSE           | 0.238      | 0.105  | 0.457     | 0.482   | 0.470  |
|          |                | CP            | 0.024      | 0.968  | 0.000     | 0.000   | 0.000  |
|          | 2              | Bias          | 0.437      | 0.280  | -59.46    | -60.81  | -53.65 |
|          |                | ASE           | 0.157      | 0.211  | 0.027     | 0.069   | 0.034  |
|          |                | ESE           | 0.094      | 0.200  | 0.000     | 0.089   | 0.047  |
|          |                | MSE           | 0.447      | 0.200  | 0.595     | 0.674   | 0.591  |
|          |                | CP            | 0.001      | 0.941  | 0.000     | 0.000   | 0.000  |

Table 3: The percent (%) bias (absolute bias for intercept  $\alpha_0$ ), average model standard error (ASE), empirical standard error (ESE), mean squared error (MSE), and coverage probabilities (CP) are given for 2000 simulated data sets with  $n = 1000$ , log-normal time, and mean zero normal error.

| $\beta$ | $\sigma_\nu^2$ | Weibull Model |            |            | Cox Model |         |         |
|---------|----------------|---------------|------------|------------|-----------|---------|---------|
|         |                |               | $\alpha_0$ | $\alpha_1$ | shape     | $\beta$ | $\beta$ |
| log(3)  | 1              | Bias          | 0.499      | 0.020      | 3.59      | 0.520   | -3.510  |
|         |                | ASE           | 0.034      | 0.040      | 0.030     | 0.052   | 0.041   |
|         |                | ESE           | 0.034      | 0.042      | 0.000     | 0.055   | 0.053   |
|         |                | MSE           | 0.500      | 0.042      | 0.036     | 0.055   | 0.065   |
|         |                | CP            | 0.000      | 0.975      | 1.000     | 0.931   | 0.772   |

Table 4: The percent (%) bias, average bootstrap standard error (ASE) for SIMEX, average model standard error (ASE) for naive, empirical standard error (ESE), mean squared error (MSE), and coverage probabilities (CP) are given for 2000 simulated data sets for the SIMEX and naive methods with  $n = 1000$ , exponential time, baseline hazard of 0.1, a normal distribution for the additive error term, and 90% uniform censoring for the true event time.

| % Censored | $\sigma_\nu^2$ | Method | % Bias | ASE   | ESE   | MSE   | CP    |
|------------|----------------|--------|--------|-------|-------|-------|-------|
| 90         | 1              | SIMEX  | -11.59 | 0.125 | 0.122 | 0.168 | 0.834 |
|            |                | Naive  | -13.55 | 0.101 | 0.101 | 0.169 | 1.000 |

Table 5: The percent (%) bias, average bootstrap standard error (ASE) for SIMEX, average model standard error (ASE) for naive, empirical standard error (ESE), mean squared error (MSE), and coverage probabilities (CP) are given for 2000 simulated data sets for the SIMEX and naive methods with  $n = 1000$ , exponential time, baseline hazard of 0.1, a normal distribution for the multiplicative error term, and 90% covariate-dependent censoring for the true event time.

| % Censored | $\sigma_\nu^2$ | Method | % Bias | ASE   | ESE   | MSE   | CP    |
|------------|----------------|--------|--------|-------|-------|-------|-------|
| 90         | 0.5            | SIMEX  | -7.912 | 0.118 | 0.115 | 0.139 | 0.894 |
|            |                | Naive  | -14.70 | 0.104 | 0.101 | 0.179 | 1.000 |

Table 6: The quantiles, interquartile range (IQR), and standard deviation (SD) for the ratio of the error-prone simulated event time and the true event time for virological failure  $\left(\frac{T'_{\lambda b}}{T}\right)$  in the VCCC example.

| $\lambda$ | 25 <sup>th</sup> | 50 <sup>th</sup> | 75 <sup>th</sup> | IQR   | SD    |
|-----------|------------------|------------------|------------------|-------|-------|
| 0         | 1                | 1                | 1                | 0     | 32.06 |
| 0.5       | 0.669            | 1.026            | 1.543            | 0.874 | 38.57 |
| 1         | 0.570            | 1.002            | 1.784            | 1.214 | 48.40 |
| 1.5       | 0.499            | 1.020            | 2.064            | 1.565 | 68.25 |
| 2         | 0.452            | 0.991            | 2.239            | 1.787 | 56.29 |

Table 7: The hazard ratios (HR) and their corresponding bootstrap 95% confidence intervals for sex, a 100-unit increase in enrollment CD4, and a 10 year increase in age at enrollment for the time at first opportunistic infection post ART.

|       | Univariate          |                     |                        |
|-------|---------------------|---------------------|------------------------|
|       | Sex                 | 100 × CD4           | 10 × Age at Enrollment |
| True  | 0.951 (0.790,1.146) | 0.781 (0.748,0.816) | 1.146 (1.057,1.242)    |
| Naive | 1.053 (0.903,1.229) | 0.840 (0.813,0.868) | 1.153 (1.079,1.232)    |
| SIMEX | 1.078 (0.914,1.270) | 0.846 (0.808,0.885) | 1.177 (1.101,1.259)    |

  

|       | Multivariate        |                     |                        |
|-------|---------------------|---------------------|------------------------|
|       | Sex                 | 100 × CD4           | 10 × Age at Enrollment |
| True  | 0.822 (0.682,0.991) | 0.782 (0.749,0.817) | 1.113 (1.025,1.209)    |
| Naive | 0.928 (0.795,1.084) | 0.843 (0.815,0.871) | 1.121 (1.048,1.200)    |
| SIMEX | 0.908 (0.754,1.095) | 0.845 (0.806,0.886) | 1.145 (1.061,1.235)    |

Table 8: The percent (%) bias, average bootstrap standard error (ASE) for SIMEX, average model standard error (ASE) for naive, empirical standard error (ESE), mean squared error (MSE), and coverage probabilities (CP) are given for 2000 simulated data sets for the SIMEX and naive methods with exponential time and mixture gamma, mean zero normal, and shifted gamma error distributions.

| Error Distribution | Covariate | Method | % Bias | ASE    | ESE    | MSE    | CP    |
|--------------------|-----------|--------|--------|--------|--------|--------|-------|
| Mixed              | CD4       | SIMEX  | -1.760 | 0.0001 | 0.0001 | 0.0001 | 0.316 |
|                    |           | Naive  | -12.40 | 0.0001 | 0.0001 | 0.0002 | 0.198 |
|                    | Gender    | SIMEX  | -1.520 | 0.058  | 0.059  | 0.059  | 0.880 |
|                    |           | Naive  | -13.16 | 0.051  | 0.052  | 0.052  | 0.878 |
|                    | Age       | SIMEX  | -3.050 | 0.003  | 0.003  | 0.003  | 0.624 |
|                    |           | Naive  | -14.99 | 0.002  | 0.002  | 0.002  | 0.623 |
| Normal             | CD4       | SIMEX  | -4.930 | 0.0001 | 0.0001 | 0.0001 | 0.299 |
|                    |           | Naive  | -11.82 | 0.0001 | 0.0001 | 0.0002 | 0.204 |
|                    | Gender    | SIMEX  | -3.170 | 0.059  | 0.060  | 0.060  | 0.875 |
|                    |           | Naive  | -11.51 | 0.051  | 0.052  | 0.052  | 0.878 |
|                    | Age       | SIMEX  | -2.580 | 0.003  | 0.003  | 0.003  | 0.634 |
|                    |           | Naive  | -10.51 | 0.002  | 0.002  | 0.002  | 0.636 |
| Gamma              | CD4       | SIMEX  | -6.620 | 0.0001 | 0.0001 | 0.0001 | 0.288 |
|                    |           | Naive  | -13.23 | 0.0001 | 0.0001 | 0.0002 | 0.180 |
|                    | Gender    | SIMEX  | -7.880 | 0.058  | 0.059  | 0.059  | 0.896 |
|                    |           | Naive  | -14.94 | 0.051  | 0.052  | 0.053  | 0.892 |
|                    | Age       | SIMEX  | -10.62 | 0.002  | 0.002  | 0.002  | 0.630 |
|                    |           | Naive  | -17.33 | 0.002  | 0.002  | 0.002  | 0.633 |

Table 9: The percent (%) bias, average bootstrap standard error (ASE) for SIMEX, average model standard error (ASE) for naive, empirical standard error (ESE), mean squared error (MSE), and coverage probabilities (CP) are given for 2000 simulated data sets for the SIMEX and naive methods with  $n = 1000$ , exponential time, and a left-skewed gamma error distribution.

| $\beta$  | $\sigma_v^2$ | Method | % Bias | ASE   | ESE   | MSE   | CP    |
|----------|--------------|--------|--------|-------|-------|-------|-------|
| log(1.5) | 0.5          | SIMEX  | 4.838  | 0.045 | 0.046 | 0.050 | 0.928 |
|          |              | Naive  | -17.79 | 0.033 | 0.033 | 0.079 | 0.399 |
|          | 1            | SIMEX  | 12.38  | 0.051 | 0.051 | 0.072 | 0.828 |
|          |              | Naive  | -22.07 | 0.033 | 0.033 | 0.095 | 0.22  |
| log(3)   | 0.5          | SIMEX  | 3.762  | 0.058 | 0.059 | 0.072 | 0.891 |
|          |              | Naive  | -17.08 | 0.040 | 0.041 | 0.192 | 0.008 |
|          | 1            | SIMEX  | 9.189  | 0.064 | 0.066 | 0.121 | 0.656 |
|          |              | Naive  | -22.24 | 0.040 | 0.039 | 0.247 | 0.000 |

Figure 1: The quadratic approximations of the  $\beta$  parameters as a function of  $\lambda$  for CD4 (a), sex (b), and age at enrollment (c), extrapolated to  $\lambda = -1$ .

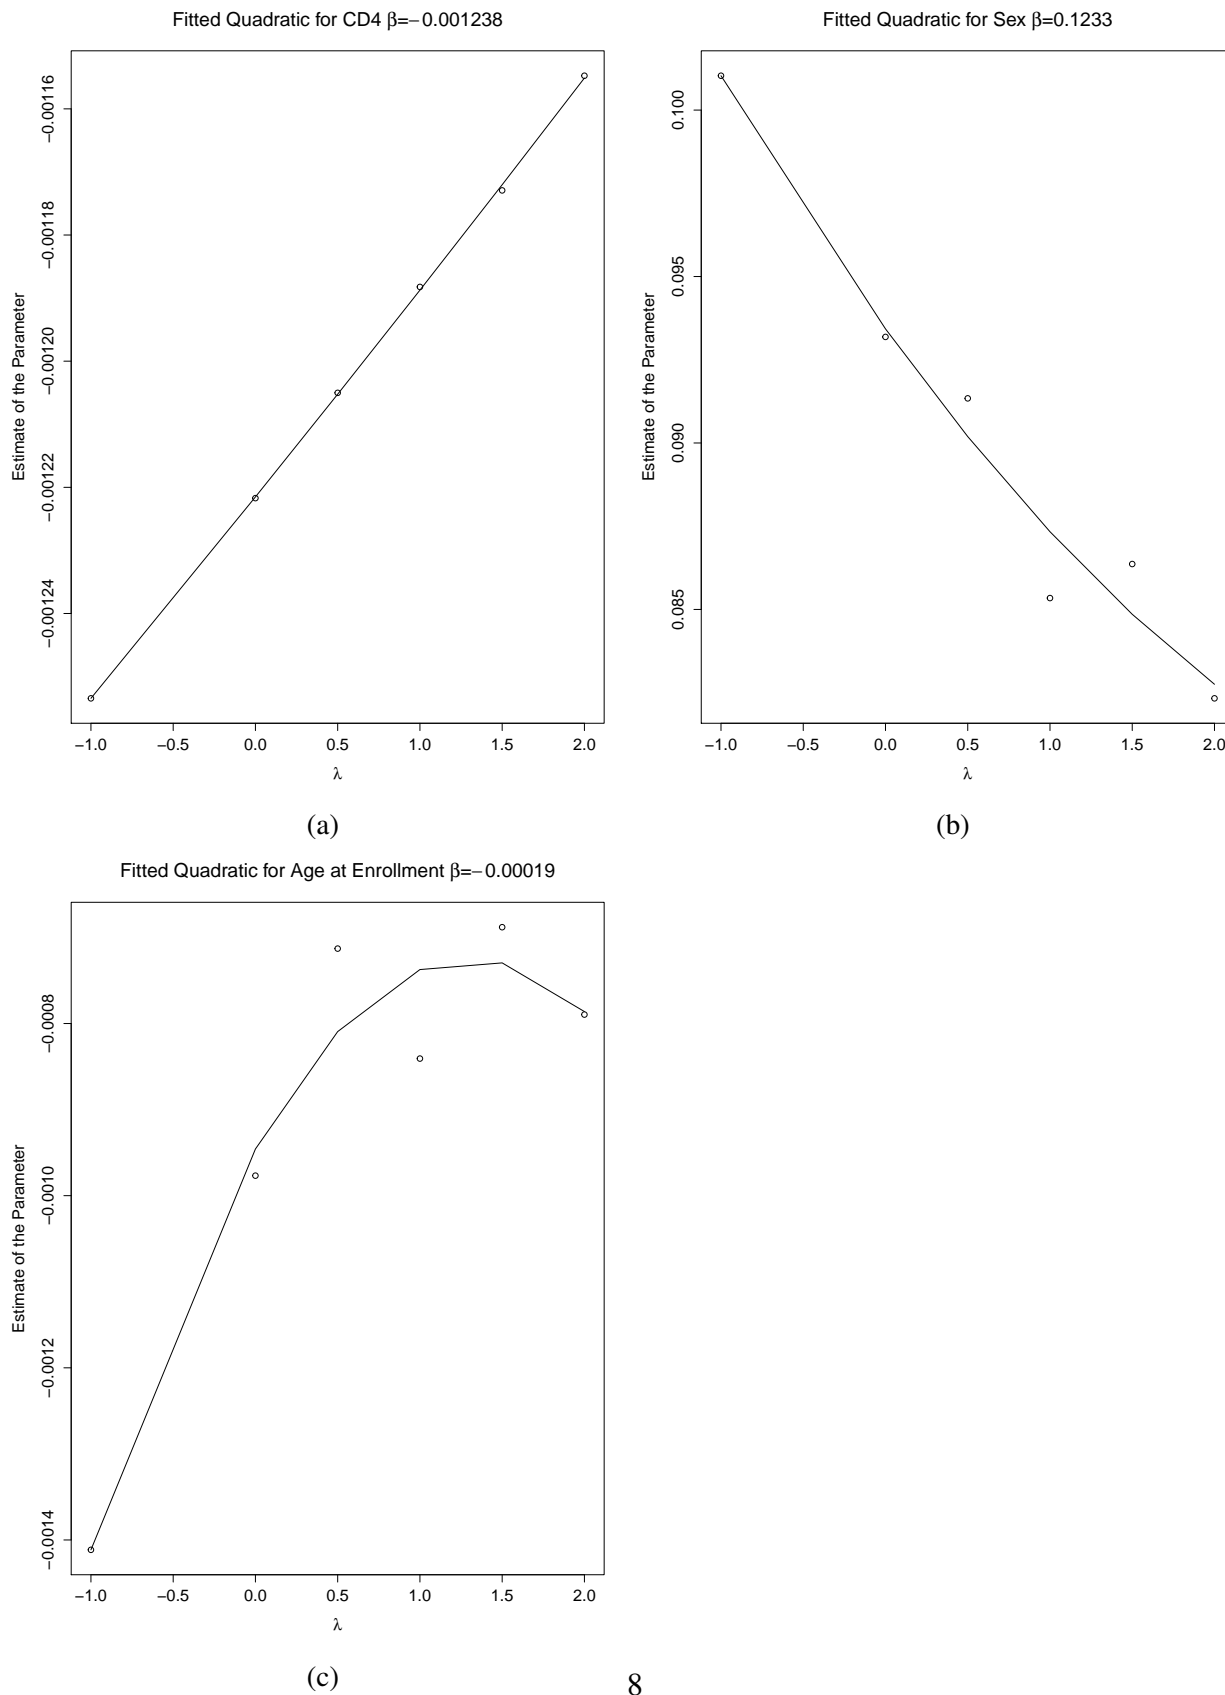

Supplement: NIHMS914900-supplement-Supp_info.pdf [file NIHMS914900-supplement-Supp_info.pdf]
